# Supplementary material for: UHRF1 regulates global DNA hypomethylation and is associated with poor prognosis in esophageal squamous cell carcinoma
Source: PubMed Central journal article supplement (PMC5295392; doi:10.18632/oncotarget.11067), 2016-08-05
Supplement: oncotarget-07-57821-s001.pdf [file oncotarget-07-57821-s001.pdf]

# UHRF1 regulates global DNA hypomethylation and is associated with poor prognosis in esophageal squamous cell carcinoma

## Supplementary Materials

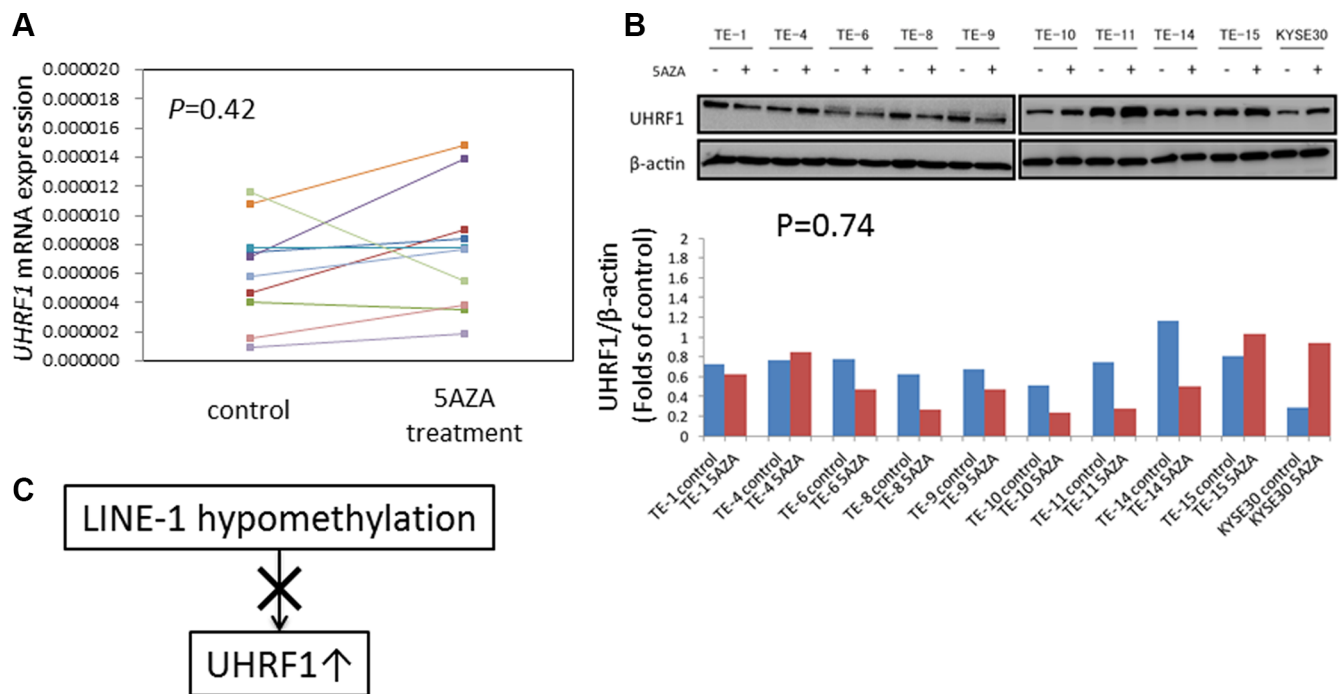

**Supplementary Figure S1: Changes of expression of UHRF1 level in ESCC cell lines treated with 5AZA.** (A) *UHRF1* mRNA expression level did not change after 5AZA treatment ( $P = 0.42$ ). (B) UHRF1 protein expression level also did not change after 5AZA treatment ( $P = 0.74$ ). (C) LINE-1 hypomethylation does not affect UHRF1 expression.

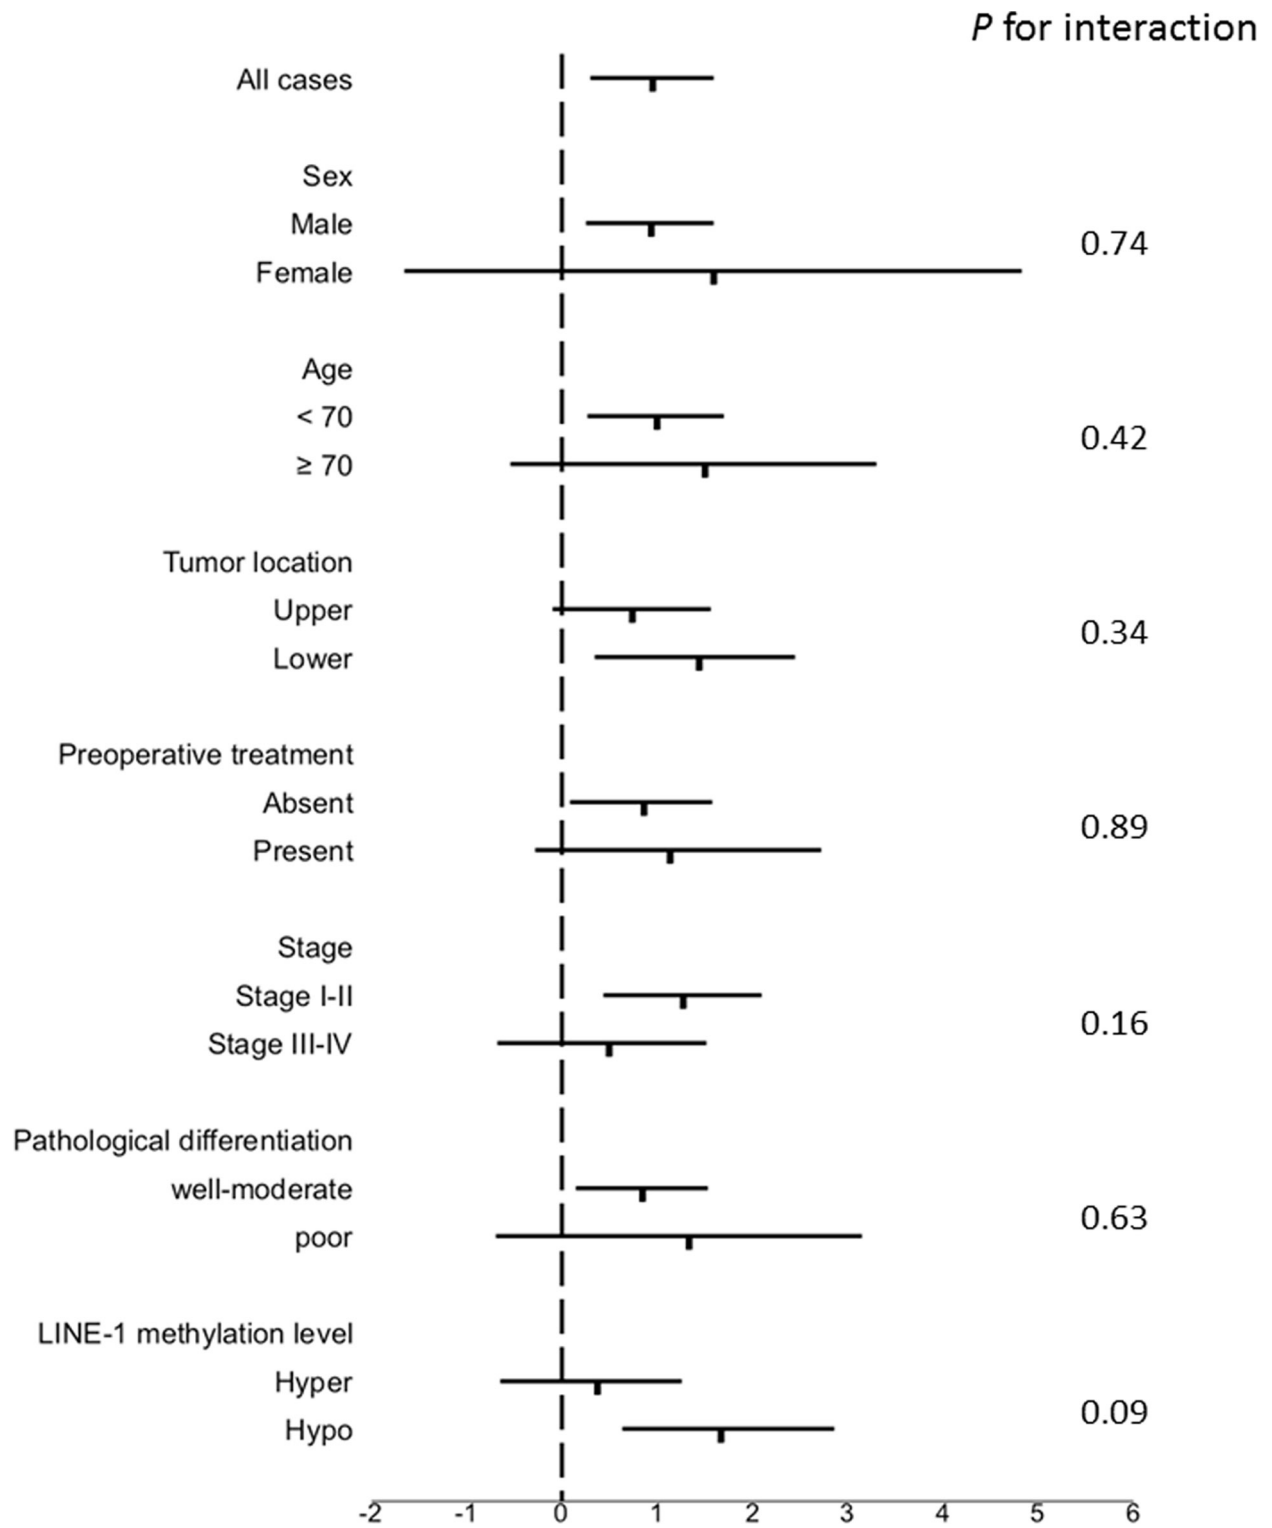

**Supplementary Figure S2: UHRF1 expression and overall survival in various strata.** Log<sub>e</sub>(HRs) plots showing the 95% CI for the overall survival rate related to UHRF1 overexpression.
